# Supplementary material for: A microbial view on secondary contact between two Alpine butterflies
Source: Research Square preprint supplement (doi:10.21203/rs.3.rs-7637106/v1), 2025-10-15
Supplement: Supplementary file 1 [file 3f80acd28b69c48efd3a71f8.pdf]

**A**

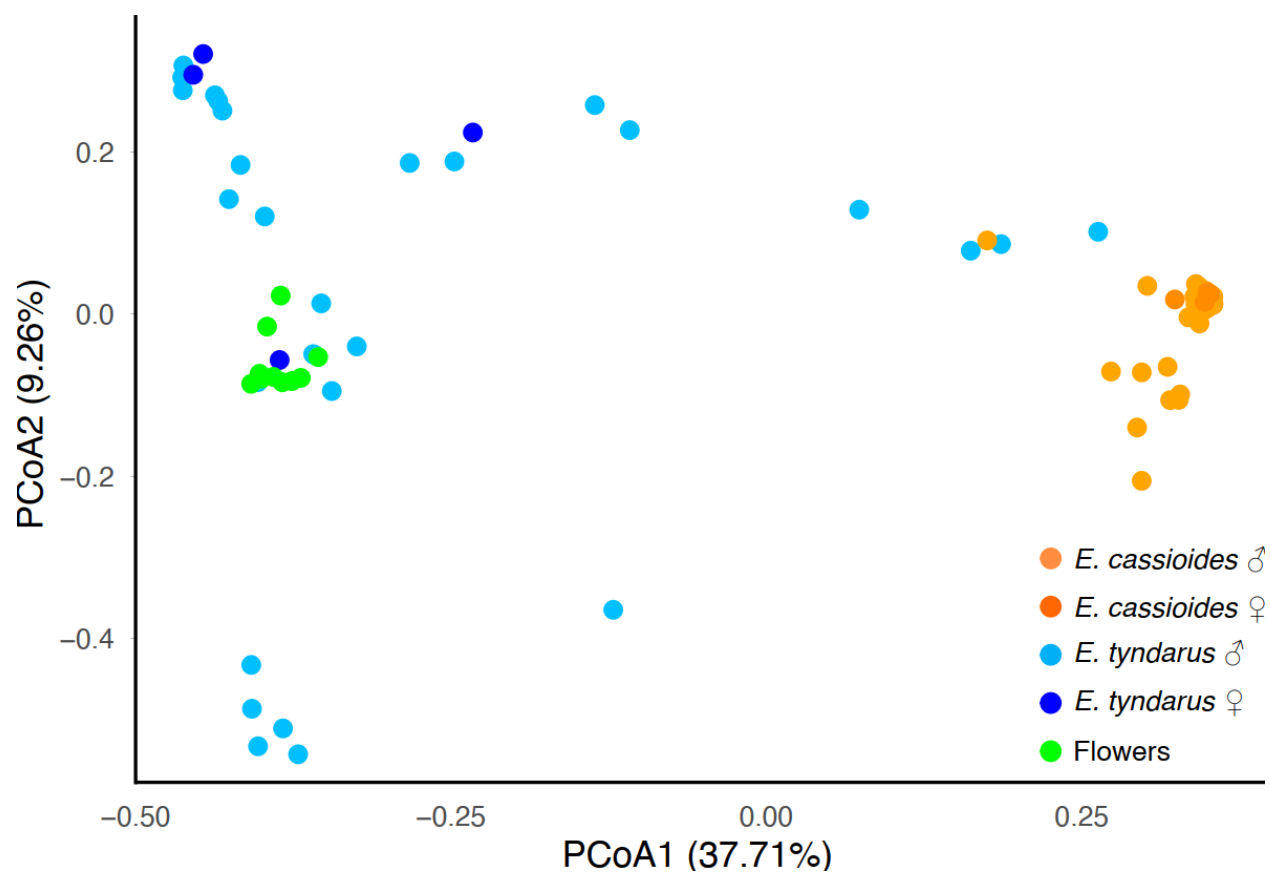

B

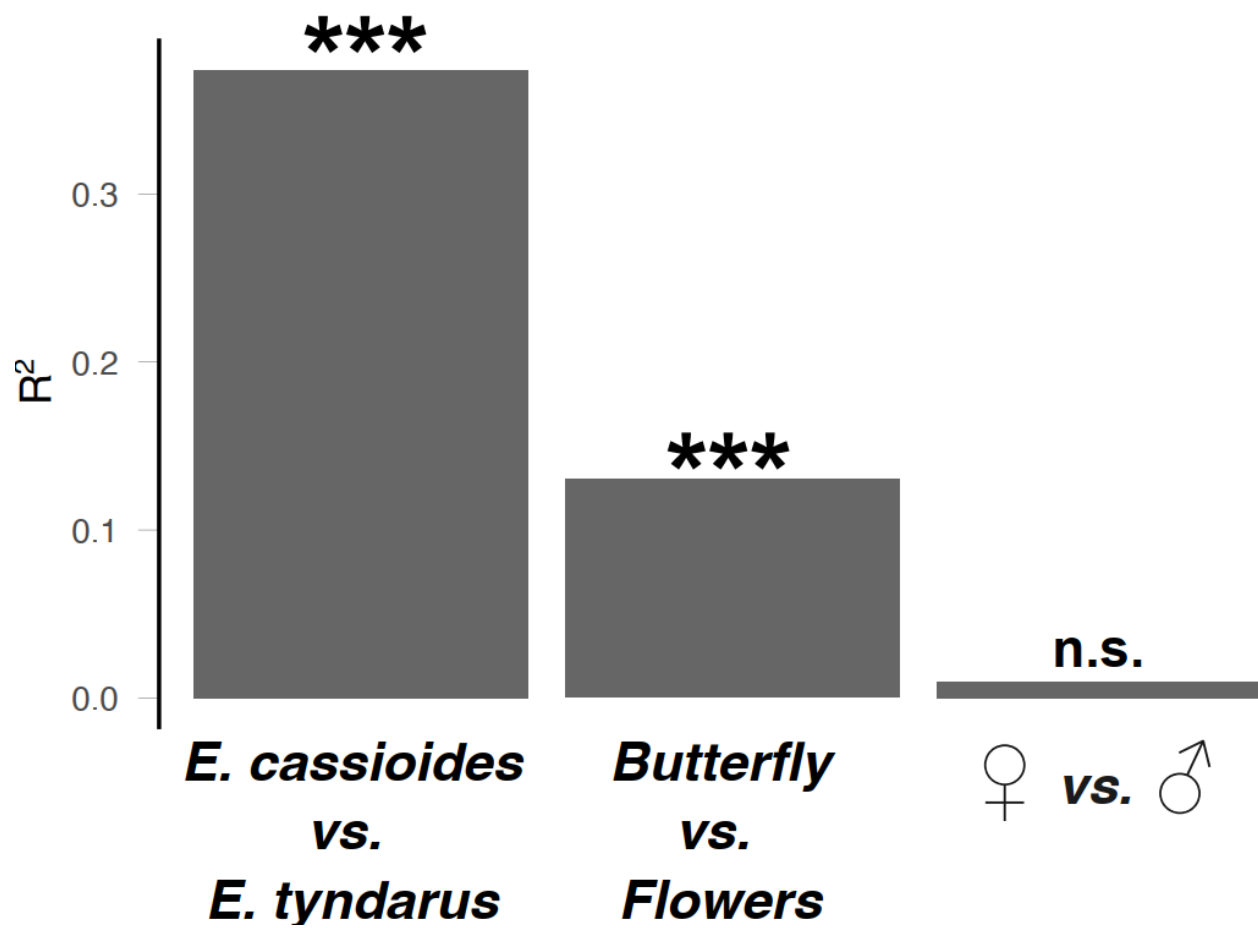

C

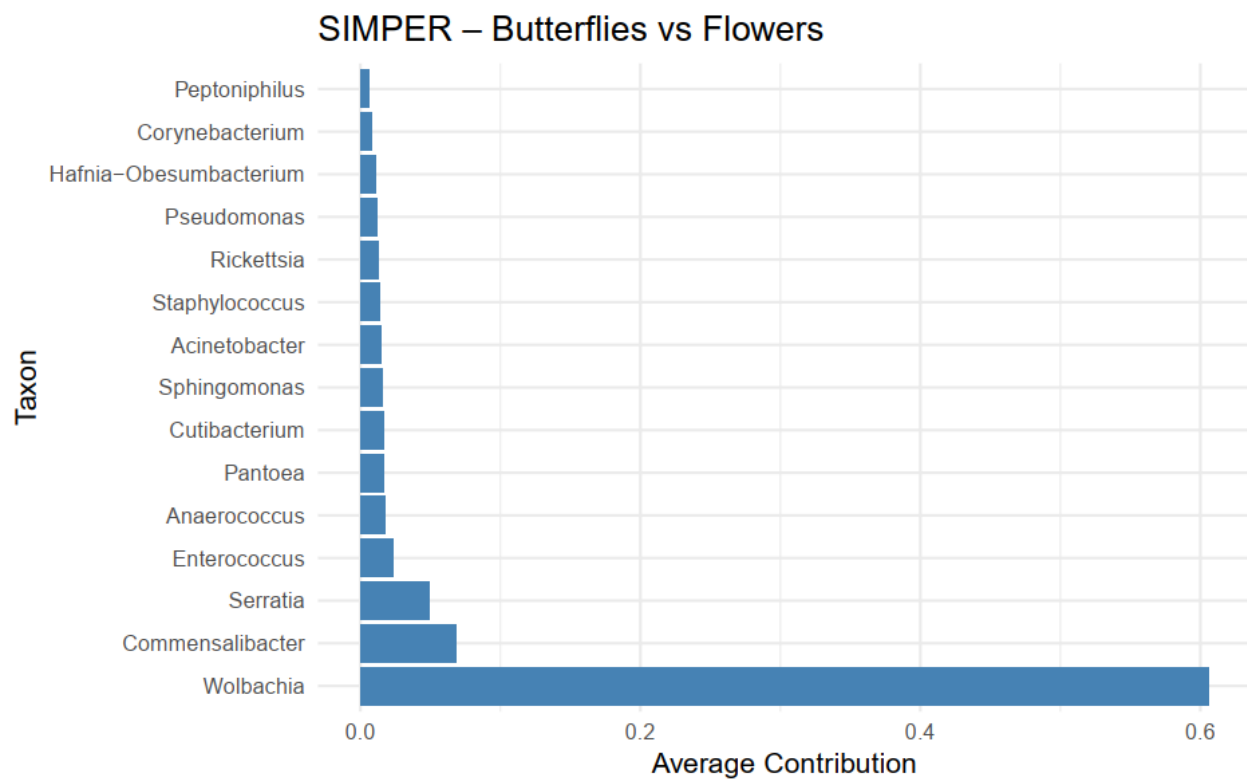

D

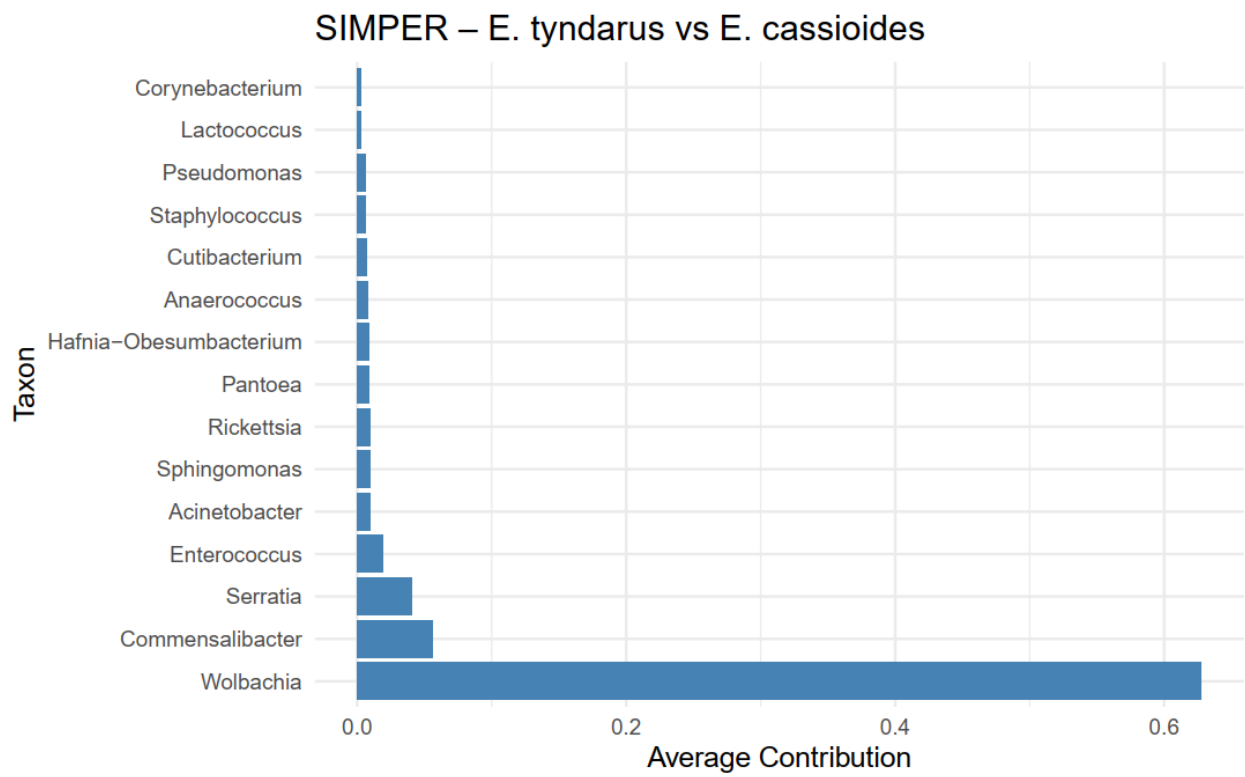

E

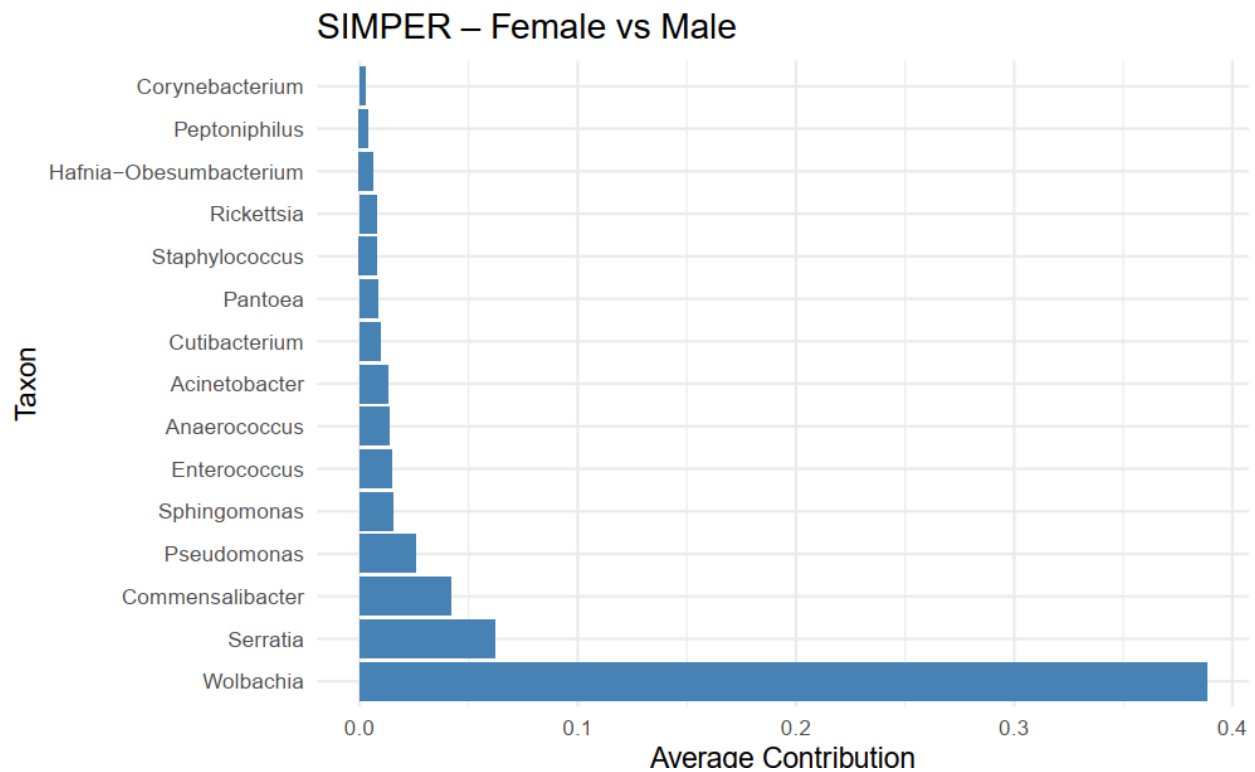

**Figure S2. Multivariate community analyses after removing *Wolbachia* and *Rickettsia* from flower samples.** (A) Principal Coordinate Analysis (PCoA) illustrating the separation of microbial communities based on Bray–Curtis dissimilarities. (B) Pairwise PERMANOVA summarizing differences in community composition with associated effect sizes ( $R^2$ ) and significance levels. SIMPER analysis identifying the main microbial taxa contributing to dissimilarities between: (C) butterfly- and flower-associated microbiota, (D) *E. tyndarus* and *E. cassioides* and (E) between female and male butterflies.
