# Supplementary material for: A microbial view on secondary contact between two Alpine butterflies
Source: Research Square preprint supplement (doi:10.21203/rs.3.rs-7637106/v1), 2025-10-15
Supplement: Supplementary file 2 [file 3cff1a4a2aa59307430ebeda.xlsx]

## Sheet: Sayfa1
Table S3. Core bacterial genera (present in >80% of samples) identified across butterfly and plant groups. Includes genus-level taxonomy, and prevalence per group
E. cassioides F	Taxon	Prevalence
	Cutibacterium	1
	Serratia	1
	Staphylococcus	1
	Wolbachia	1
E. cassioides M	Commensalibacter	0.842105263157895
	Cutibacterium	0.868421052631579
	Staphylococcus	0.842105263157895
	Wolbachia	1
E. tyndarus F	Acinetobacter	1
	Commensalibacter	1
	Corynebacterium	1
	Cutibacterium	1
	Flavobacterium	1
	Methylobacterium-Methylorubrum	1
	Mycobacterium	1
	Staphylococcus	1
	Wolbachia	1
E. tyndarus M	Corynebacterium	0.896551724137931
	Cutibacterium	1
	Sphingomonas	0.827586206896552
	Staphylococcus	1
	Wolbachia	1
Flowers	Commensalibacter	0.909090909090909
	Serratia	0.909090909090909
	Sphingomonas	0.818181818181818
	Staphylococcus	0.909090909090909
	Wolbachia	1
