# Supplementary material for: A microbial view on secondary contact between two Alpine butterflies
Source: Research Square preprint supplement (doi:10.21203/rs.3.rs-7637106/v1), 2025-10-15
Supplement: Supplementary file 2 [file 99f9756a8332d7d9f193c8b4.pdf]

A

*E. tyndarus* vs *E. cassioides* – SIMPER (Top 15 Taxa)

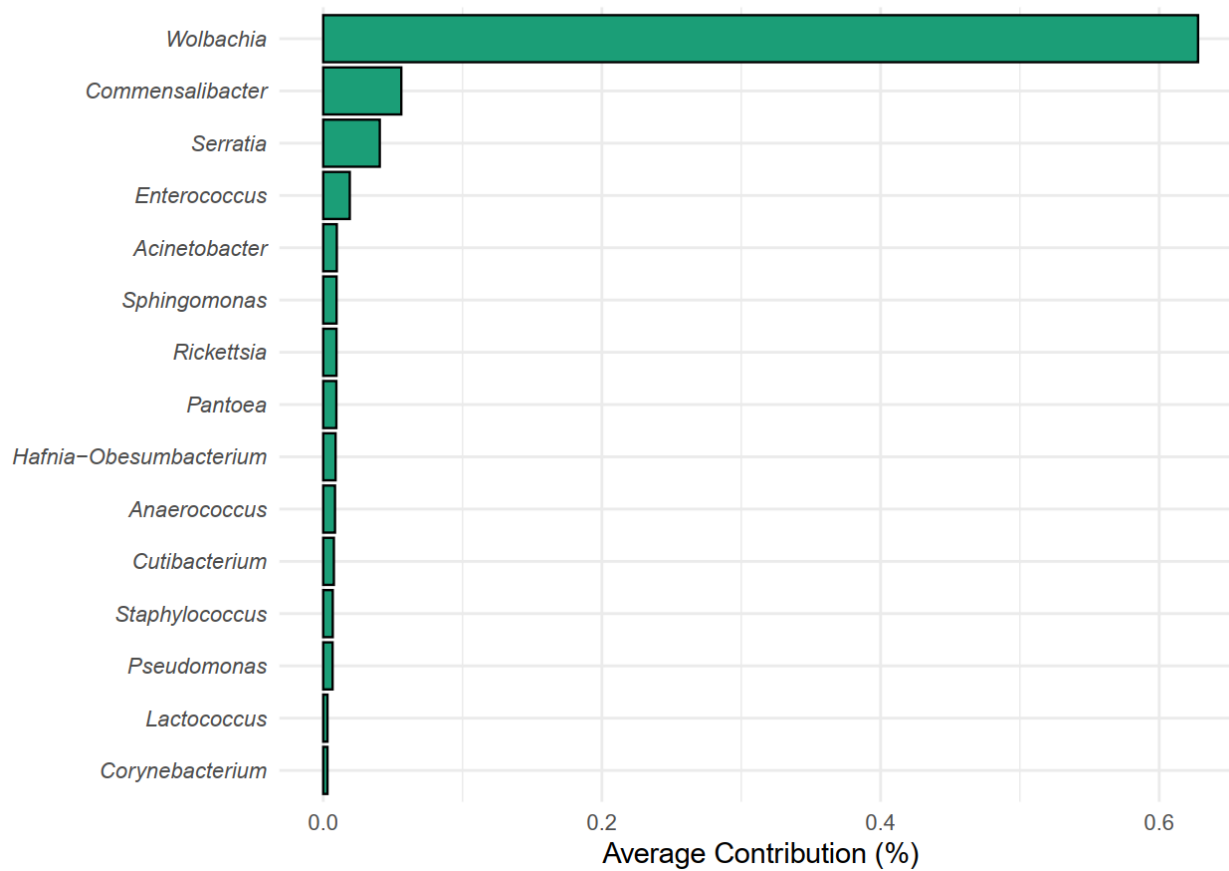

B

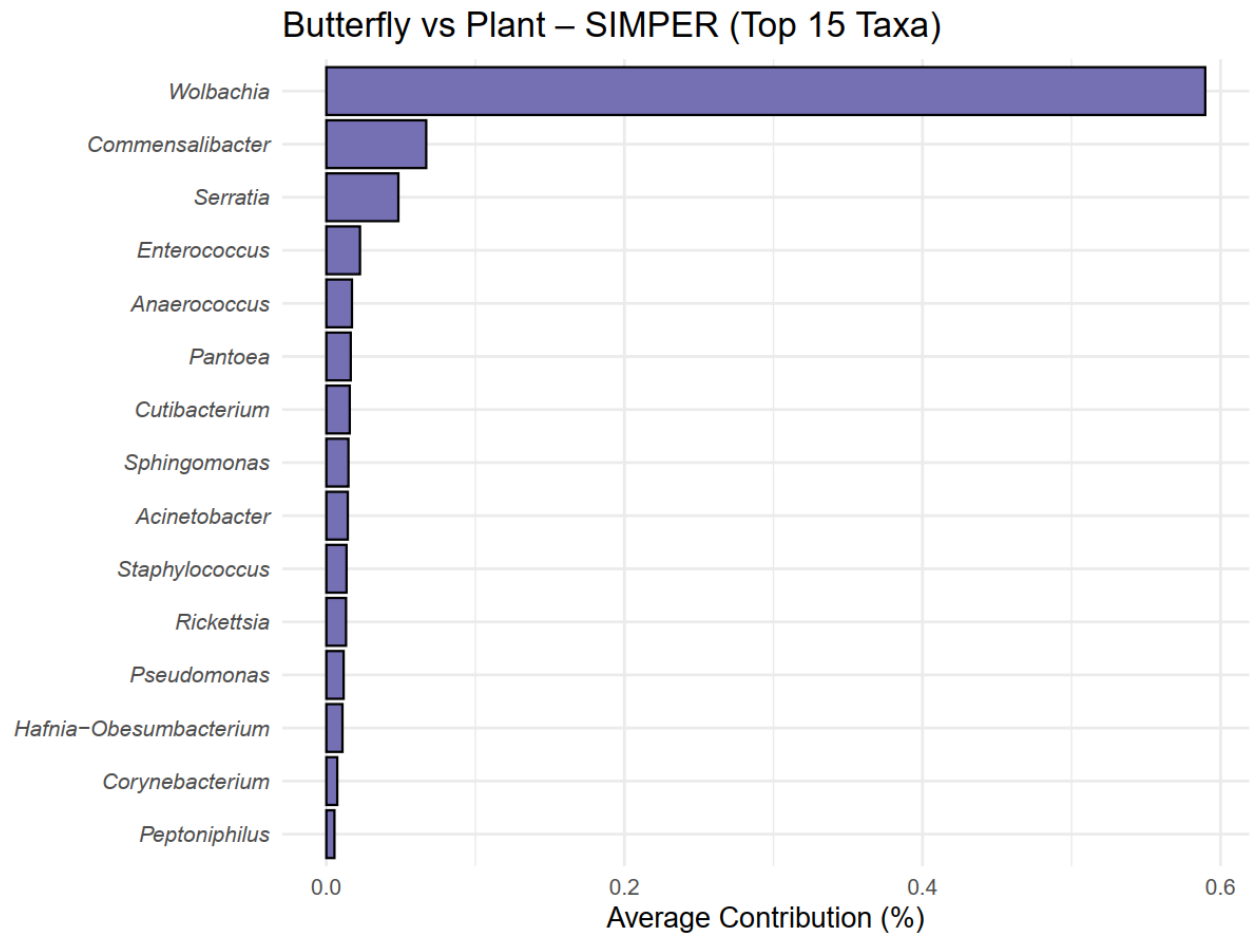

Figure S1 SIMPER analysis of microbial genera contributing to compositional dissimilarity between (A) *Erebia tyndarus* and *E. cassioides* and (B) butterfly and plant samples. Bars show the top 15 bacterial genera ranked by their average contribution to Bray–Curtis dissimilarity between the two groups species.
