# Supplementary material for: A microbial view on secondary contact between two Alpine butterflies
Source: Research Square preprint supplement (doi:10.21203/rs.3.rs-7637106/v1), 2025-10-15
Supplement: Supplementary file 4 [file cc15ec7654bdd1354f5420a8.xlsx]

## Sheet: Sayfa1
Table S2. Indicator species analysis with IndVal scores and significance
E. cassioides F	E. cassioides M	E. tyndarus F	E. tyndarus M	Plant	index	stat	p.value	Taxon
0	0	1	0	0	3	0.707106781186548	0.004	Acidibacter
0	0	1	0	0	3	0.576543350180081	0.045	Actinomycetospora
0	0	1	0	0	3	0.595299788874318	0.012	Aeromicrobium
0	0	1	1	0	13	0.869742712251258	0.002	Anaerococcus
0	0	1	0	0	3	0.842706638533004	0.001	Bacillus
0	0	1	0	0	3	0.699350981157585	0.01	Bdellovibrio
0	0	1	0	0	3	0.631443304075027	0.043	Chryseobacterium
0	0	1	1	0	13	0.926141051152132	0.002	Corynebacterium
1	0	1	1	0	19	0.994025244471961	0.001	Cutibacterium
0	0	1	0	0	3	0.577110124903512	0.018	Fimbriiglobus
0	0	1	1	0	13	0.884614035892637	0.001	Flavobacterium
0	0	1	0	0	3	0.497879849106876	0.037	Fluviicola
0	0	1	1	0	13	0.651130420558421	0.027	Hymenobacter
0	0	1	0	0	3	0.70212726934746	0.004	Iamia
0	0	1	0	0	3	0.702915239922543	0.001	Luteimonas
0	0	1	1	0	13	0.810917741708792	0.004	Methylobacterium-Methylorubrum
0	0	1	1	0	13	0.730795406368292	0.019	Microbacterium
0	0	1	1	0	13	0.693725956046634	0.029	Micrococcus
0	0	1	1	0	13	0.896643871451708	0.002	Mycobacterium
0	0	1	0	0	3	0.780434872866345	0.004	Nakamurella
0	0	1	0	0	3	0.840438914639723	0.001	Nannocystis
0	0	1	1	0	13	0.674199862463242	0.022	Nocardioides
1	0	1	0	0	7	0.5	0.004	Ochrobactrum
0	0	1	1	0	13	0.75742687109409	0.013	Peptoniphilus
0	0	1	0	1	14	0.516397779494322	0.017	Pleurocapsa PCC-7319
0	0	0	1	0	4	0.52321968162873	0.038	Prevotella
1	0	1	0	1	20	0.817835200920817	0.037	Pseudomonas
0	0	1	0	0	3	0.611330782065299	0.036	Pseudonocardia
0	0	1	0	0	3	0.677095148001037	0.011	Rhodococcus
0	0	1	0	0	3	0.498660797288869	0.04	SH-PL14
0	0	1	1	1	25	0.903640514820581	0.007	Sphingomonas
1	0	1	1	0	19	0.986622154827031	0.001	Staphylococcus
0	0	1	1	0	13	0.735304987588436	0.017	Streptococcus
0	0	1	0	0	3	0.805462052552878	0.002	Tundrisphaera
